# Supplementary material
Source: Springer Nature journal article supplement (https://www.springermedizin.de/resource/supplementary/12885_2013_4284_MOESM5_ESM.pdf/9466820)

**SATDIP mean scores by type of treatment**

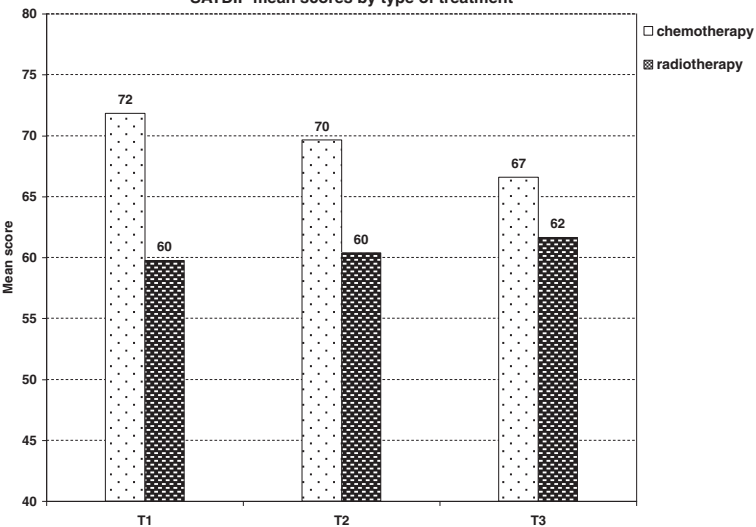

**SATNIP mean scores by type of treatment**

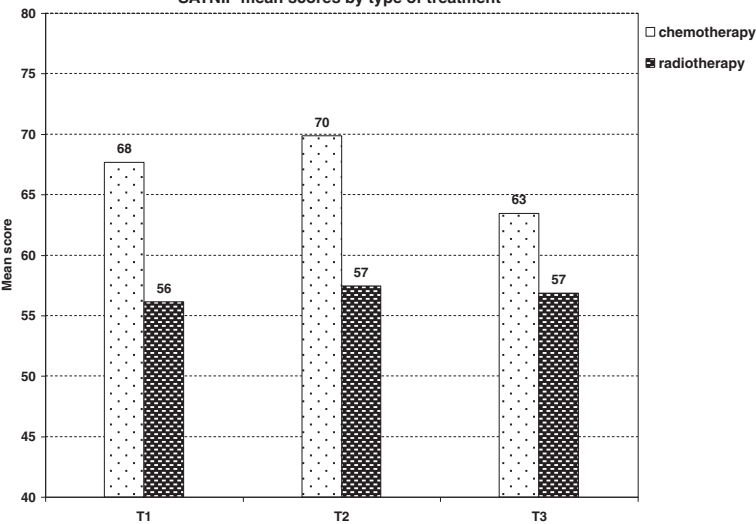

Supplement: MOESM5 [file 9466820]
